# Supplementary material for: A study on adatom transport through (√3 × √3)–R30°–CH3S self-assembled monolayers on Au(111) using first principles calculations
Source: Royal Society of Chemistry journal article supplement (doi:10.1039/c4cp03074e), 2014-01-01
Supplement: c4cp03074e1.pdf [file c4cp03074e1.pdf]

## Supporting Information

# Monitoring the reversible photoisomerization of an azobenzene- functionalized molecular triazatriangulene platform on Au(111) by IRRAS

*Hanne Jacob<sup>a</sup>, Sandra Ulrich<sup>b</sup>, Ulrich Jung<sup>c</sup>, Sonja Kuhn<sup>c</sup>, Talina Rusch<sup>c</sup>, Christian Schütt<sup>b</sup>,  
Finn Petersen<sup>a</sup>, Thomas Strunskus<sup>d</sup>, Olaf Magnussen<sup>c</sup>, Rainer Herges<sup>\*b</sup> and Felix Tuczek<sup>\*a</sup>*

<sup>a</sup>Institut für Anorganische Chemie, Christian-Albrechts-Universität Kiel, Max-Eyth-Str.2,  
24118 Kiel, Germany

<sup>b</sup>Institut für Organische Chemie, Christian-Albrechts-Universität Kiel, Otto-Hahn-Platz 4  
24098 Kiel, Germany

<sup>c</sup>Institut für Experimentelle und Angewandte Physik der Christian-Albrechts-Universität Kiel,  
Leibnizstraße 11-19, 24118 Kiel, Germany

<sup>d</sup>Technische Fakultät der Christian-Albrechts-Universität Kiel, Kaiserstraße 2, 24143 Kiel,  
Germany

Corresponding authors:

RH: Email: rherges@ac.uni-kiel.de

FT: E-Mail: ftuczek@ac.uni-kiel.de, fax: +49 431 880-1523

**Table S1.** Cartesian coordinates of the optimized structure for methoxy-azo-TATA (propyl side chains) *trans*.

XYZ file

90

Energy = -2008.147853891 Basis = RB3LYP 6-31++G(d,p), Charge 0, Singlet

|   |           |            |            |
|---|-----------|------------|------------|
| C | 3.9673356 | 1.9951678  | -1.1887097 |
| N | 3.7169768 | 1.3405710  | -2.4086399 |
| C | 3.7131519 | -0.0668466 | -2.4518879 |
| C | 3.4349548 | -0.7880758 | -1.2661601 |
| C | 3.0133737 | -0.0367514 | -0.0061244 |
| C | 3.7006529 | 1.3249226  | 0.0282536  |
| C | 3.9542420 | 1.9493814  | 1.2730930  |
| N | 3.6801526 | 1.2418173  | 2.4595123  |
| C | 3.6745915 | -0.1646937 | 2.4406177  |
| C | 3.4197272 | -0.8422233 | 1.2252023  |
| C | 3.9953742 | -0.7846636 | -3.6402232 |
| C | 3.9617283 | -2.1833473 | -3.6308746 |
| C | 3.6765189 | -2.9030012 | -2.4655329 |
| C | 3.4198689 | -2.2026837 | -1.2623749 |
| N | 3.1501584 | -2.8869616 | -0.0631139 |
| C | 3.4133347 | -2.2563100 | 1.1683781  |
| C | 4.4832745 | 3.3137774  | -1.1557025 |
| C | 4.7376452 | 3.9215787  | 0.0783031  |
| C | 4.4926374 | 3.2598209  | 1.2864429  |
| C | 3.9199662 | -0.9168163 | 3.6151050  |
| C | 3.9244731 | -2.3140732 | 3.5478931  |
| C | 3.6873274 | -2.9920968 | 2.3470260  |
| H | 4.2684892 | -0.2632361 | -4.5677117 |
| H | 4.1851983 | -2.7312646 | -4.5611776 |

|   |             |            |            |
|---|-------------|------------|------------|
| H | 3.6783410   | -4.0006821 | -2.4917989 |
| H | 4.7089262   | 3.8559465  | -2.0834539 |
| H | 5.1620113   | 4.9388512  | 0.1001290  |
| H | 4.7501611   | 3.7580256  | 2.2308774  |
| H | 4.1398821   | -2.8960283 | 4.4591902  |
| H | 3.7457855   | -4.0888963 | 2.3306655  |
| C | 1.5395275   | 0.1368587  | -0.0092328 |
| C | 0.3142937   | 0.2581117  | -0.0072291 |
| C | -1.1061037  | 0.3759060  | -0.0027081 |
| C | -1.9273026  | -0.7891121 | -0.0282530 |
| C | -1.7388457  | 1.6470235  | 0.0292178  |
| C | -3.3153636  | -0.6888109 | -0.0212981 |
| C | -3.9392960  | 0.5843966  | 0.0117210  |
| C | -3.1313382  | 1.7446929  | 0.0362505  |
| N | -5.3314493  | 0.7955394  | 0.0225559  |
| N | -6.0377652  | -0.2632053 | 0.0014276  |
| C | -7.4272127  | -0.0607840 | 0.0123860  |
| C | -8.2286471  | -1.2221207 | -0.0122266 |
| C | -9.6267420  | -1.1424768 | -0.0046416 |
| C | -10.2486621 | 0.1253174  | 0.0286955  |
| C | -9.4498687  | 1.2991877  | 0.0540267  |
| C | -8.0638815  | 1.2095175  | 0.0460325  |
| H | -1.4396372  | -1.7774700 | -0.0536940 |
| H | -1.1153166  | 2.5545635  | 0.0484612  |
| H | -3.9588734  | -1.5813929 | -0.0405844 |
| H | -3.6382875  | 2.7225928  | 0.0615738  |
| H | -7.7172762  | -2.1976837 | -0.0380395 |
| H | -10.2215949 | -2.0673638 | -0.0246384 |
| H | -9.9651727  | 2.2727876  | 0.0800961  |
| H | -7.4282772  | 2.1078192  | 0.0652199  |

|   |             |            |            |
|---|-------------|------------|------------|
| H | 4.1296223   | -0.4197847 | 4.5715869  |
| C | 3.4552273   | 1.9397525  | 3.7253146  |
| H | 4.2326132   | 1.6585721  | 4.4745531  |
| H | 3.5867375   | 3.0228196  | 3.5446912  |
| C | 2.6509254   | -4.2605835 | -0.1200996 |
| H | 3.3775654   | -4.9245717 | -0.6456328 |
| H | 2.5860855   | -4.6416637 | 0.9157392  |
| C | 3.5206291   | 2.1376046  | -3.6195277 |
| H | 4.4212792   | 2.7610896  | -3.8322007 |
| H | 3.4253339   | 1.4415171  | -4.4734828 |
| O | -11.5906685 | 0.3266612  | 0.0390498  |
| C | -12.4535041 | -0.7960901 | 0.0151910  |
| H | -12.3122175 | -1.4050793 | -0.9088674 |
| H | -12.3043017 | -1.4495288 | 0.9070105  |
| H | -13.4856422 | -0.3915861 | 0.0295559  |
| C | 1.2569513   | -4.3769422 | -0.7602882 |
| H | 1.2813339   | -3.9625341 | -1.7919614 |
| H | 0.5544843   | -3.7329256 | -0.1832331 |
| C | 2.2571087   | 3.0138521  | -3.5753674 |
| H | 2.3026013   | 3.6955753  | -2.6974438 |
| H | 1.3792593   | 2.3502264  | -3.4077246 |
| C | 2.0742162   | 3.8279616  | -4.8592742 |
| H | 1.1515239   | 4.4460408  | -4.8136401 |
| H | 2.9306810   | 4.5189419  | -5.0313937 |

**Table S2.** Raman band positions and assignments for methoxy-azo-TATA (propyl side chains) *trans*. The frequencies are given in wavenumbers ( $\text{cm}^{-1}$ ) obtained from bulk Raman, calculated and SERS spectra. Mode numbers derive from the Gaussian frequency calculation (RB3LYP 6-31++G(d,p)).

| Peak #    | Mode No. | Calc. freq. uncorrected | Calc. freq. corrected | Calc. Intensity | Bulk freq. | SERS freq. | Assignment                                           |
|-----------|----------|-------------------------|-----------------------|-----------------|------------|------------|------------------------------------------------------|
|           | 223      | 2301.8                  | 2197.1                | 16040.9         | 2202       | 2198       | Alkine stretching                                    |
| <b>30</b> | 219      | 1647.5                  | 1590.6                | 4248.4          | 1598       | 1598       | C=C stretching<br>Ph <sub>top</sub>                  |
| <b>35</b> | 212      | 1547.1                  | 1497.5                | 8318.3          | 1495       | 1493       | N=N stretching.<br>C-H bending Ph                    |
| <b>43</b> | 204      | 1509.1                  | 1462.2                | 9126.1          | -          | 1485       | C-H bending<br>CH <sub>3</sub> Methoxy               |
| <b>44</b> | 201      | 1505.9                  | 1459.3                | 9093.8          | 1453       | 1452       | C-H bending<br>CH <sub>3</sub> Methoxy               |
| <b>47</b> | 188      | 1456.8                  | 1413.7                | 3849.1          | 1418       | 1417       | C=C ring<br>deformation Ph <sub>top</sub>            |
|           | 187      | 1442.3                  | 1400.4                | 3711.0          | 1403       | 1403       | C=C ring<br>deformation Ph <sub>bot</sub>            |
| <b>52</b> | 177      | 1371.9                  | 1335.1                | 160.8           | 1363       | -          | C=C ring<br>deformation,<br>Ph <sub>top</sub>        |
|           | 173      | 1341.3                  | 1306.7                | 620.6           | 1311       | 1312       | C=C ring<br>deformation,<br>Ph <sub>bot</sub>        |
|           | 166      | 1322.9                  | 1289.7                | 477.8           | 1302       | 1304       | C-H bending<br>Ph <sub>top</sub>                     |
|           | 164      | 1305.2                  | 1273.2                | 110.5           | 1287       | -          | C=C ring<br>deformation<br>Ph <sub>TATA</sub>        |
|           | 160      | 1281.2                  | 1251.0                | 1797.6          | 1253       | 1253       | C-Alkine<br>stretching                               |
| <b>55</b> | 154      | 1262.6                  | 1233.7                | 17.0            | 1234       | -          | C-H twisting.<br>Alkyl <sub>TATA</sub>               |
| <b>56</b> | 153      | 1219.0                  | 1193.3                | 4146.1          | 1188       | 1190       | C-H bending<br>Ph <sub>top</sub> , Ph <sub>bot</sub> |
| <b>61</b> | 140      | 1163.4                  | 1141.8                | 12937.3         | 1140       | 1140       | C-H bending<br>Ph <sub>top</sub> , Ph <sub>bot</sub> |
|           | 137      | 1125.2                  | 1106.4                | 242.4           | 1103       | 1108       | C-H bending<br>Ph <sub>top</sub> , Ph <sub>bot</sub> |
| <b>64</b> | 123      | 1011.4                  | 1000.8                | 270.3           | 991        | 998        | C <sub>tertTATA</sub> -Alkine<br>stretching          |

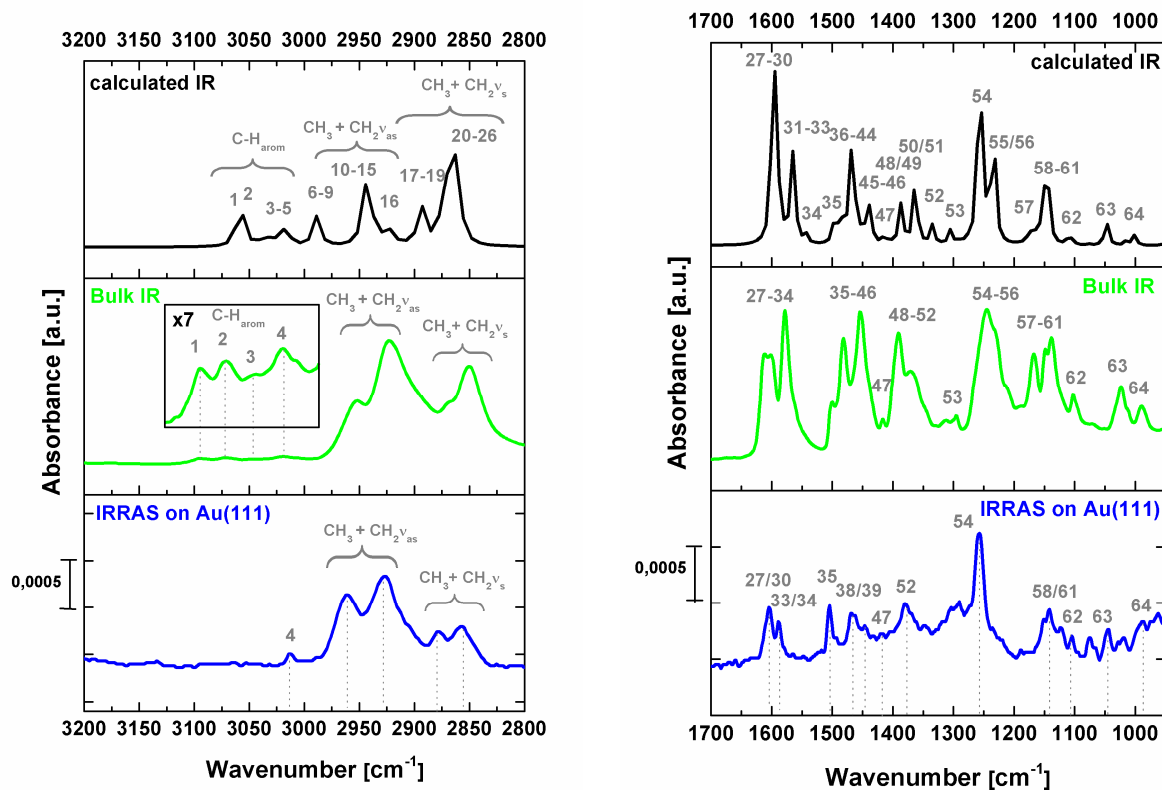

**Figure S1.** IR data of methoxy-azo-TATA. Left: CH-stretching vibration region, right: fingerprint region. The spectra in the top panels show the calculated, the spectra in the middle the bulk and the blue spectra at the bottom the IRRAS data of the surface-adsorbed monolayer. Band numbers correspond to Table S3.

**Table S3.** Infrared vibrational band assignments for methoxy-azo-TATA (propyl side chains) *trans*. The vibrational frequencies are given in wavenumbers ( $\text{cm}^{-1}$ ) obtained from ATR, calculated and IRRAS. Mode numbers derive from the Gaussian frequency calculation (RB3LYP 6-31++G(d,p)). The orientation of the transition dipole moment (TDM) is given with respect to the surface plane (perpendicular:  $\perp$ , parallel:  $\parallel$  and neither totally parallel nor totally perpendicular:  $/$ ). \*For broad features the experimental frequency regime is indicated instead of exact wavenumbers

| Peak #   | Mode No. | Calc. freq. uncorrected | Calc. freq. corrected | Calc. Intensity | Bulk freq./ regime* | IRRAS freq. | TDM         | Assignment                           |
|----------|----------|-------------------------|-----------------------|-----------------|---------------------|-------------|-------------|--------------------------------------|
|          | 264      | 3234.2                  | 3061.4                | 8.0             |                     |             | /           | C-H stretching<br>Ph <sub>TATA</sub> |
|          | 263      | 3233.8                  | 3061.0                | 10.8            |                     |             | $\parallel$ | C-H stretching<br>Ph <sub>TATA</sub> |
|          | 262      | 3233.5                  | 3060.8                | 15.5            |                     |             | $\parallel$ | C-H stretching<br>Ph <sub>TATA</sub> |
|          | 261      | 3229.8                  | 3057.4                | 19.8            |                     |             | $\parallel$ | C-H stretching<br>Ph <sub>TATA</sub> |
|          | 260      | 3229.7                  | 3057.2                | 8.7             |                     |             | $\parallel$ | C-H stretching<br>Ph <sub>TATA</sub> |
|          | 259      | 3228.9                  | 3056.5                | 12.1            |                     |             | $\perp$     | C-H stretching<br>Ph <sub>top</sub>  |
| <b>1</b> | 258      | 3228.1                  | 3055.7                | 10.2            | C-H <sub>arom</sub> | -           | /           | C-H stretching<br>Ph <sub>top</sub>  |
| <b>2</b> | 257      | 3227.8                  | 3055.5                | 13.0            | C-H <sub>arom</sub> | -           | $\parallel$ | C-H stretching<br>Ph <sub>TATA</sub> |
|          | 256      | 3227.1                  | 3054.8                | 2.2             |                     |             | /           | C-H stretching<br>Ph <sub>bot</sub>  |
|          | 255      | 3213.0                  | 3041.8                | 7.8             |                     |             | /           | C-H stretching<br>Ph <sub>bot</sub>  |
|          | 254      | 3205.0                  | 3034.3                | 3.0             |                     |             | /           | C-H stretching<br>Ph <sub>top</sub>  |
|          | 253      | 3202.6                  | 3032.1                | 8.5             |                     |             | /           | C-H stretching<br>Ph <sub>top</sub>  |
|          | 252      | 3200.2                  | 3029.9                | 6.6             |                     |             | /           | C-H stretching<br>Ph <sub>bot</sub>  |
|          | 251      | 3197.7                  | 3027.6                | 8.6             |                     |             | $\perp$     | C-H stretching<br>Ph <sub>bot</sub>  |
| <b>3</b> | 250      | 3186.0                  | 3016.7                | 13.8            | C-H <sub>arom</sub> | 3014        | /           | C-H stretching<br>Ph <sub>TATA</sub> |
| <b>4</b> | 249      | 3185.7                  | 3016.5                | 16.5            | C-H <sub>arom</sub> |             | /           | C-H stretching<br>Ph <sub>TATA</sub> |
| <b>5</b> | 248      | 3185.4                  | 3016.2                | 17.1            | C-H <sub>arom</sub> | -           | /           | C-H stretching<br>Ph <sub>TATA</sub> |

|    |     |        |        |      |                                 |                                 |   |                                                          |
|----|-----|--------|--------|------|---------------------------------|---------------------------------|---|----------------------------------------------------------|
| 6  | 247 | 3156.9 | 2989.7 | 16.7 | CH <sub>2</sub> v <sub>as</sub> | -                               |   | C-H stretching<br>Alkyl <sub>TATA</sub>                  |
| 7  | 246 | 3156.4 | 2989.3 | 25.8 | CH <sub>3</sub> v <sub>as</sub> | CH <sub>3</sub> v <sub>as</sub> | ⊥ | C-H stretching<br>CH <sub>3</sub> -methoxy               |
| 8  | 245 | 3155.9 | 2988.8 | 15.2 | CH <sub>2</sub> v <sub>as</sub> | CH <sub>2</sub> v <sub>as</sub> | / | C-H stretching<br>Alkyl <sub>TATA</sub>                  |
| 9  | 244 | 3154.4 | 2987.4 | 15.1 | CH <sub>2</sub> v <sub>as</sub> | -                               |   | C-H stretching<br>Alkyl <sub>TATA</sub>                  |
| 10 | 243 | 3108.8 | 2945.2 | 29.6 | CH <sub>3</sub> v <sub>as</sub> | CH <sub>3</sub> v <sub>as</sub> | / | C-H stretching<br>CH <sub>3</sub> -Alkyl <sub>TATA</sub> |
| 11 | 242 | 3108.4 | 2944.8 | 29.2 |                                 |                                 | / | C-H stretching<br>CH <sub>3</sub> -Alkyl <sub>TATA</sub> |
| 12 | 241 | 3108.2 | 2944.6 | 29.4 |                                 |                                 | / | C-H stretching<br>CH <sub>3</sub> -Alkyl <sub>TATA</sub> |
| 13 | 240 | 3104.4 | 2941.1 | 32.5 | CH <sub>2</sub> v <sub>as</sub> | CH <sub>2</sub> v <sub>as</sub> | / | C-H stretching<br>Alkyl <sub>TATA</sub>                  |
| 14 | 239 | 3104.3 | 2941.0 | 36.1 |                                 |                                 | / | C-H stretching<br>Alkyl <sub>TATA</sub>                  |
| 15 | 238 | 3104.1 | 2940.9 | 36.8 |                                 |                                 | / | C-H stretching<br>Alkyl <sub>TATA</sub>                  |
| 16 | 237 | 3087.4 | 2925.4 | 34.5 | CH <sub>3</sub> v <sub>as</sub> | -                               |   | C-H stretching<br>CH <sub>3</sub> -methoxy               |
|    | 236 | 3082.1 | 2920.4 | 5.0  |                                 |                                 | / | C-H stretching<br>Alkyl <sub>TATA</sub>                  |
|    | 235 | 3081.6 | 2919.9 | 5.3  |                                 |                                 | / | C-H stretching<br>Alkyl <sub>TATA</sub>                  |
|    | 234 | 3081.5 | 2919.9 | 6.0  |                                 |                                 | / | C-H stretching<br>Alkyl <sub>TATA</sub>                  |
| 17 | 233 | 3054.5 | 2894.8 | 30.7 | CH <sub>2</sub> v <sub>s</sub>  | CH <sub>2</sub> v <sub>s</sub>  | / | C-H stretching<br>Alkyl <sub>TATA</sub>                  |
| 18 | 232 | 3053.5 | 2893.9 | 30.8 |                                 |                                 | / | C-H stretching<br>Alkyl <sub>TATA</sub>                  |
| 19 | 231 | 3051.2 | 2891.8 | 36.0 |                                 |                                 | / | C-H stretching<br>Alkyl <sub>TATA</sub>                  |
| 20 | 230 | 3030.6 | 2872.7 | 39.2 | CH <sub>3</sub> v <sub>s</sub>  | -                               |   | C-H stretching<br>CH <sub>3</sub> -Alkyl <sub>TATA</sub> |
| 21 | 229 | 3030.3 | 2872.4 | 53.3 | CH <sub>3</sub> v <sub>s</sub>  | -                               |   | C-H stretching<br>CH <sub>3</sub> -Alkyl <sub>TATA</sub> |
| 22 | 228 | 3030.1 | 2872.2 | 68.5 | CH <sub>3</sub> v <sub>s</sub>  | -                               |   | C-H stretching<br>CH <sub>3</sub> -Alkyl <sub>TATA</sub> |
| 23 | 227 | 3021.6 | 2864.3 | 97.0 | CH <sub>3</sub> v <sub>s</sub>  | CH <sub>3</sub> v <sub>s</sub>  | / | C-H stretching<br>CH <sub>3</sub> -methoxy               |
| 24 | 226 | 3019.4 | 2862.3 | 45.5 | CH <sub>2</sub> v <sub>s</sub>  | CH <sub>2</sub> v <sub>s</sub>  | / | C-H stretching<br>Alkyl <sub>TATA</sub>                  |
| 25 | 225 | 3017.9 | 2860.9 | 46.8 |                                 |                                 | / | C-H stretching<br>Alkyl <sub>TATA</sub>                  |
| 26 | 224 | 3016.9 | 2860.0 | 44.8 |                                 |                                 | / | C-H stretching<br>Alkyl <sub>TATA</sub>                  |
|    | 223 | 2301.8 | 2197.1 | 28.9 |                                 |                                 | ⊥ | Alkyne stretching                                        |



|    |     |        |        |       |       |      |   |                                                    |
|----|-----|--------|--------|-------|-------|------|---|----------------------------------------------------|
| 27 | 222 | 1655.5 | 1598.0 | 190.7 | ~1600 | 1606 | ⊥ | C=C stretching<br>Ph <sub>top</sub>                |
| 28 | 221 | 1654.4 | 1596.9 | 266.0 |       | -    | ∥ | C=C stretching<br>Ph <sub>TATA</sub>               |
| 29 | 220 | 1654.3 | 1596.9 | 262.3 |       | -    | ∥ | C=C stretching<br>Ph <sub>TATA</sub>               |
| 30 | 219 | 1647.5 | 1590.6 | 203.2 |       | 1606 | ⊥ | C=C stretching<br>Ph <sub>top</sub>                |
|    | 218 | 1638.2 | 1581.9 | 17.7  |       |      | ⊥ | C=C stretching<br>Ph <sub>top</sub>                |
| 31 | 217 | 1621.1 | 1566.0 | 139.0 | ~1590 | -    | ∥ | C=C stretching<br>Ph <sub>TATA</sub>               |
| 32 | 216 | 1620.7 | 1565.7 | 140.1 | ~1585 | -    | ∥ | C=C stretching<br>Ph <sub>TATA</sub>               |
| 33 | 215 | 1616.9 | 1562.2 | 69.9  | ~1580 | 1589 | ⊥ | C=C stretching<br>Ph <sub>top</sub>                |
|    | 214 | 1611.3 | 1557.0 | 0.1   |       |      | / | C=C stretching<br>Ph <sub>TATA</sub>               |
| 34 | 213 | 1596.7 | 1543.4 | 28.6  | ~1580 | 1589 | ⊥ | C=C stretching<br>Ph <sub>bot</sub>                |
| 35 | 212 | 1547.1 | 1497.5 | 59.4  | ~1500 | 1504 | ⊥ | N=N stretching.<br>C-H bending Ph.                 |
| 36 | 211 | 1535.9 | 1487.1 | 64.0  | ~1485 | -    | ⊥ | C-H bending<br>Ph <sub>top,bot</sub>               |
| 37 | 210 | 1534.7 | 1485.9 | 46.9  | ~1475 | -    | ⊥ | C-H bending<br>Ph <sub>top, Ph<sub>bot</sub></sub> |
| 38 | 209 | 1520.2 | 1472.5 | 24.8  | ~1470 | 1468 | / | C-H bending<br>Alkyl <sub>TATA</sub>               |
| 39 | 208 | 1519.6 | 1472.0 | 26.8  |       |      | / | C-H bending<br>Alkyl <sub>TATA</sub>               |
| 40 | 207 | 1517.6 | 1470.2 | 46.0  | ~1460 | -    | ∥ | C-H bending<br>Alkyl <sub>TATA</sub>               |
| 41 | 206 | 1516.0 | 1468.6 | 130.0 |       | -    | / | C-H bending<br>Alkyl <sub>TATA</sub>               |
| 42 | 205 | 1515.3 | 1468.0 | 106.7 |       | -    | ∥ | C-H bending<br>Alkyl <sub>TATA</sub>               |
| 43 | 204 | 1509.1 | 1462.2 | 41.5  |       | -    | ⊥ | C-H bending<br>CH <sub>3</sub> Methoxy             |
|    | 203 | 1507.3 | 1460.6 | 2.8   |       |      | ∥ | C-H bending<br>Alkyl <sub>TATA</sub>               |
|    | 202 | 1507.3 | 1460.6 | 3.6   |       |      | / | C-H bending<br>Alkyl <sub>TATA</sub>               |
| 44 | 201 | 1505.9 | 1459.3 | 23.2  | ~1460 | -    | ⊥ | C-H bending<br>CH <sub>3</sub> Methoxy             |
|    | 200 | 1505.9 | 1459.2 | 4.8   |       |      | / | C-H bending<br>Alkyl <sub>TATA</sub>               |
|    | 199 | 1505.0 | 1458.4 | 8.3   |       |      | / | C-H bending<br>Alkyl <sub>TATA</sub>               |
|    | 198 | 1504.8 | 1458.3 | 12.2  |       |      | / | C-H bending<br>Alkyl <sub>TATA</sub>               |

|           |     |        |        |       |       |      |   |                                                  |
|-----------|-----|--------|--------|-------|-------|------|---|--------------------------------------------------|
|           | 197 | 1503.2 | 1456.8 | 11.0  |       |      | / | C-H bending<br>Alkyl <sub>TATA</sub>             |
|           | 196 | 1500.0 | 1453.8 | 0.4   |       |      | / | C-H bending<br>Alkyl <sub>TATA</sub>             |
|           | 195 | 1499.9 | 1453.7 | 0.7   |       |      | / | C-H bending<br>Alkyl <sub>TATA</sub>             |
|           | 194 | 1499.1 | 1452.9 | 0.3   |       |      | / | C-H bending<br>Alkyl <sub>TATA</sub>             |
|           | 193 | 1496.9 | 1451.0 | 8.5   |       |      |   | C-H bending<br>CH <sub>3</sub> Methoxy           |
| <b>45</b> | 192 | 1486.4 | 1441.2 | 79.4  | ~1450 | -    |   | C=C ring<br>deformation,<br>Ph <sub>TATA</sub>   |
| <b>46</b> | 191 | 1486.1 | 1440.9 | 76.8  |       | -    |   | C=C ring<br>deformation,<br>Ph <sub>TATA</sub>   |
|           | 190 | 1482.3 | 1437.4 | 1.5   |       |      |   | C=C ring<br>deformation,<br>Ph <sub>TATA</sub>   |
|           | 189 | 1478.1 | 1433.6 | 19.3  |       |      | ⊥ | C-H bending.<br>CH <sub>3</sub> -Methoxy         |
| <b>47</b> | 188 | 1456.8 | 1413.7 | 30.2  | ~1420 | 1420 | ⊥ | C=C ring<br>deformation,<br>Ph <sub>top</sub>    |
|           | 187 | 1442.3 | 1400.4 | 5.2   |       |      |   | C=C ring<br>deformation,<br>Ph <sub>bot</sub>    |
| <b>48</b> | 186 | 1428.1 | 1387.1 | 67.9  | ~1390 | -    |   | C-H bending<br>Alkyl <sub>TATA</sub>             |
| <b>49</b> | 185 | 1427.7 | 1386.8 | 68.1  |       | -    |   | C-H bending<br>Alkyl <sub>TATA</sub>             |
|           | 184 | 1421.3 | 1380.8 | 0.7   |       |      |   | C-H bending<br>Alkyl <sub>TATA</sub>             |
|           | 183 | 1418.2 | 1378.0 | 5.8   |       |      |   | CH <sub>3</sub> bending<br>Alkyl <sub>TATA</sub> |
|           | 182 | 1417.2 | 1377.1 | 2.7   |       |      |   | CH <sub>3</sub> bending<br>Alkyl <sub>TATA</sub> |
|           | 181 | 1416.4 | 1376.3 | 1.1   |       |      |   | CH <sub>3</sub> bending<br>Alkyl <sub>TATA</sub> |
| <b>50</b> | 180 | 1402.4 | 1363.3 | 115.5 | ~1375 | -    |   | C-H bending<br>Alkyl <sub>TATA</sub>             |
| <b>51</b> | 179 | 1401.4 | 1362.4 | 119.8 |       | -    |   | C-H bending<br>Alkyl <sub>TATA</sub>             |
|           | 178 | 1379.5 | 1342.1 | 0.3   |       |      |   | C-H bending<br>Alkyl <sub>TATA</sub>             |
| <b>52</b> | 177 | 1371.9 | 1335.1 | 65.0  | ~1370 | 1380 | ⊥ | C=C ring<br>deformation,<br>Ph <sub>top</sub>    |
|           | 176 | 1361.3 | 1325.2 | 1.1   |       |      |   | C=C ring<br>deformation,                         |

|           |     |        |        |       |       |      |   |                                                                             |
|-----------|-----|--------|--------|-------|-------|------|---|-----------------------------------------------------------------------------|
|           |     |        |        |       |       |      |   | Ph <sub>TATA</sub>                                                          |
|           | 175 | 1361.0 | 1325.0 | 1.3   |       |      |   | C=C ring deformation, Ph <sub>TATA</sub>                                    |
|           | 174 | 1345.0 | 1310.2 | 0.3   |       |      |   | C=C ring deformation, Ph <sub>TATA</sub>                                    |
|           | 173 | 1341.3 | 1306.7 | 4.9   |       |      | / | C=C ring deformation, Ph <sub>bot</sub>                                     |
| <b>53</b> | 172 | 1340.4 | 1305.8 | 22.2  | ~1295 | -    |   | C-H bending Alkyl <sub>TATA</sub>                                           |
|           | 171 | 1339.5 | 1305.0 | 4.5   |       |      |   | C-H bending Alkyl <sub>TATA</sub>                                           |
|           | 170 | 1338.7 | 1304.3 | 16.6  |       |      |   | C-H bending Alkyl <sub>TATA</sub>                                           |
|           | 169 | 1334.4 | 1300.3 | 1.3   |       |      |   | C-H bending Alkyl <sub>TATA</sub>                                           |
|           | 168 | 1332.6 | 1298.7 | 0.5   |       |      |   | C-H bending Alkyl <sub>TATA</sub>                                           |
|           | 167 | 1327.0 | 1293.5 | 0.3   |       |      | / | C-H bending Alkyl <sub>TATA</sub>                                           |
|           | 166 | 1322.9 | 1289.7 | 6.5   |       |      | ⊥ | C-H bending, Ph <sub>top</sub>                                              |
|           | 165 | 1317.8 | 1284.9 | 0.3   |       |      |   | C-H bending, Ph <sub>bot</sub>                                              |
|           | 164 | 1305.2 | 1273.2 | 10.9  |       |      | ⊥ | C=C ring deformation, Ph <sub>TATA</sub>                                    |
| <b>54</b> | 163 | 1287.9 | 1257.2 | 645.3 | ~1245 | 1257 | ⊥ | C-O stretching. C=C Ph <sub>top</sub> . C-H bending CH <sub>3</sub> Methoxy |
|           | 162 | 1286.7 | 1256.1 | 25.4  |       |      |   | C-H twisting, Alkyl <sub>TATA</sub>                                         |
|           | 161 | 1285.8 | 1255.2 | 29.6  |       |      |   | C-H twisting, Alkyl <sub>TATA</sub>                                         |
|           | 160 | 1281.2 | 1251.0 | 86.1  |       |      | ⊥ | C-Alkine stretching                                                         |
|           | 159 | 1274.4 | 1244.7 | 17.7  |       |      |   | C-H bending Ph <sub>TATA</sub>                                              |
|           | 158 | 1273.9 | 1244.2 | 12.9  |       |      |   | C-H bending Ph <sub>TATA</sub>                                              |
|           | 157 | 1269.7 | 1240.3 | 2.9   |       |      | / | C-H twisting, Alkyl <sub>TATA</sub>                                         |
|           | 156 | 1267.4 | 1238.2 | 11.0  |       |      | ⊥ | C-N stretching, C-H bending Ph <sub>top</sub> , Ph <sub>bot</sub>           |
|           | 155 | 1263.0 | 1234.1 | 209.2 |       |      |   | C-H twisting, Alkyl <sub>TATA</sub>                                         |

|           |     |        |        |       |       |      |   |                                                       |                                                      |
|-----------|-----|--------|--------|-------|-------|------|---|-------------------------------------------------------|------------------------------------------------------|
| <b>55</b> | 154 | 1262.6 | 1233.8 | 200.6 | ~1240 | -    |   | C-H twisting,<br>Alkyl <sub>TATA</sub>                |                                                      |
| <b>56</b> | 153 | 1219.0 | 1193.3 | 1.2   |       | -    | ⊥ | C-H bending<br>Ph <sub>top</sub> , Ph <sub>bot</sub>  |                                                      |
|           | 152 | 1215.8 | 1190.4 | 0.6   |       |      | / | C-H bending<br>Ph <sub>TATA</sub>                     |                                                      |
|           | 151 | 1215.4 | 1190.0 | 1.0   |       |      | / | C-H bending<br>Ph <sub>TATA</sub>                     |                                                      |
|           | 150 | 1211.3 | 1186.2 | 1.0   |       |      | / | C-H bending<br>Ph <sub>TATA</sub>                     |                                                      |
|           | 149 | 1204.6 | 1180.0 | 13.5  |       |      | / | C-H rocking,<br>CH <sub>3</sub> Methoxy               |                                                      |
| <b>57</b> | 148 | 1192.6 | 1168.8 | 23.4  | ~1165 | -    |   | C-H bending<br>Ph <sub>TATA</sub>                     |                                                      |
|           | 147 | 1192.2 | 1168.5 | 9.7   |       |      |   |                                                       | C-H bending<br>Ph <sub>TATA</sub>                    |
|           | 146 | 1192.1 | 1168.4 | 32.6  |       |      |   |                                                       | C-H bending<br>Ph <sub>TATA</sub>                    |
| <b>58</b> | 145 | 1174.0 | 1151.6 | 175.2 | ~1160 | 1144 | ⊥ | C-H bending,<br>Ph <sub>top</sub> , Ph <sub>bot</sub> |                                                      |
|           | 144 | 1169.5 | 1147.4 | 0.8   |       |      |   |                                                       | C-H rocking CH <sub>3</sub><br>Methoxy               |
|           | 143 | 1167.3 | 1145.4 | 10.8  |       |      |   |                                                       | C-H rocking<br>Alkyl <sub>TATA</sub>                 |
| <b>59</b> | 142 | 1166.4 | 1144.6 | 70.9  | ~1150 | -    |   | C-H rocking<br>Alkyl <sub>TATA</sub>                  |                                                      |
| <b>60</b> | 141 | 1166.0 | 1144.2 | 65.8  |       | -    |   | C-H rocking<br>Alkyl <sub>TATA</sub>                  |                                                      |
| <b>61</b> | 140 | 1163.4 | 1141.8 | 57.1  | ~1140 | 1144 | / | C-H bending<br>Ph <sub>top</sub> , Ph <sub>bot</sub>  |                                                      |
|           | 139 | 1133.4 | 1114.0 | 0.2   |       |      |   | /                                                     | ring deformation,<br>Ph <sub>TATA</sub>              |
| <b>62</b> | 138 | 1129.8 | 1110.7 | 18.5  | ~1100 | 1105 | / | C-H bending<br>Ph <sub>top</sub> , Ph <sub>bot</sub>  |                                                      |
|           | 137 | 1125.2 | 1106.4 | 4.1   |       |      |   | /                                                     | C-H bending<br>Ph <sub>top</sub> , Ph <sub>bot</sub> |
|           | 136 | 1123.8 | 1105.1 | 6.1   |       |      |   |                                                       | ring deformation,<br>Ph <sub>TATA</sub>              |
|           | 135 | 1123.3 | 1104.6 | 6.8   |       |      |   | ring deformation,<br>Ph <sub>TATA</sub>               |                                                      |
|           | 134 | 1121.6 | 1103.0 | 0.2   |       |      |   | C-H rocking<br>Alkyl <sub>TATA</sub>                  |                                                      |
|           | 133 | 1118.8 | 1100.5 | 0.0   |       |      |   | C-H rocking<br>Alkyl <sub>TATA</sub>                  |                                                      |
|           | 132 | 1118.5 | 1100.1 | 0.1   |       |      |   | ring deformation,<br>Ph <sub>TATA</sub>               |                                                      |
|           | 131 | 1094.0 | 1077.4 | 4.3   |       |      | ⊥ | N-C stretching<br>Alkyl <sub>TATA</sub>               |                                                      |
| <b>63</b> | 130 | 1061.8 | 1047.6 | 86.8  | ~1130 | 1045 | / | O-CH <sub>3</sub> stretching<br>Methoxy, ring         |                                                      |

|           |     |        |        |      |      |     |   |                                                               |
|-----------|-----|--------|--------|------|------|-----|---|---------------------------------------------------------------|
|           |     |        |        |      |      |     |   | deformation<br>Ph <sub>top</sub>                              |
|           | 129 | 1043.2 | 1030.4 | 1.3  |      |     | / | C-H bending,<br>Ph <sub>TATA</sub> ,<br>Alkyl <sub>TATA</sub> |
|           | 128 | 1040.5 | 1027.9 | 0.1  |      |     |   | C-C stretching<br>Alkyl <sub>TATA</sub>                       |
|           | 127 | 1039.2 | 1026.7 | 0.1  |      |     |   | C-C stretching<br>Alkyl <sub>TATA</sub>                       |
|           | 126 | 1036.2 | 1023.8 | 0.0  |      |     |   | C-C stretching<br>Alkyl <sub>TATA</sub>                       |
|           | 125 | 1026.3 | 1014.7 | 15.4 |      |     | ⊥ | ring deformation,<br>Ph <sub>bot</sub>                        |
|           | 124 | 1017.4 | 1006.4 | 1.8  |      |     | / | ring deformation,<br>Ph <sub>top</sub>                        |
| <b>64</b> | 123 | 1011.4 | 1000.8 | 33.9 | ~998 | 998 | ⊥ | C <sub>tertTATA</sub> -Alkine<br>stretching                   |
|           | 122 | 993.2  | 984.1  | 0.2  |      |     |   | C-H twisting<br>Ph <sub>bot</sub>                             |
|           | 121 | 984.0  | 975.5  | 0.1  |      |     |   | C-H twisting<br>Ph <sub>top</sub>                             |
|           | 120 | 979.8  | 971.6  | 0.4  |      |     |   | C-H twisting<br>Ph <sub>bot</sub>                             |
|           | 119 | 965.5  | 958.3  | 0.8  |      |     | / | C-H twisting<br>Ph <sub>TATA</sub>                            |
|           | 118 | 964.5  | 957.4  | 0.8  |      |     |   | C-H twisting<br>Ph <sub>TATA</sub>                            |
|           | 117 | 962.8  | 955.8  | 0.6  |      |     | ⊥ | C-H twisting<br>Ph <sub>TATA</sub>                            |
|           | 116 | 916.8  | 913.2  | 0.2  |      |     | / | C-H twisting<br>Ph <sub>TATA</sub>                            |
|           | 115 | 960.9  | 954.1  | 0.2  |      |     | / | C-H twisting<br>Ph <sub>TATA</sub>                            |
|           | 114 | 955.5  | 949.0  | 1.3  |      |     |   | C-H twisting<br>Ph <sub>top</sub>                             |

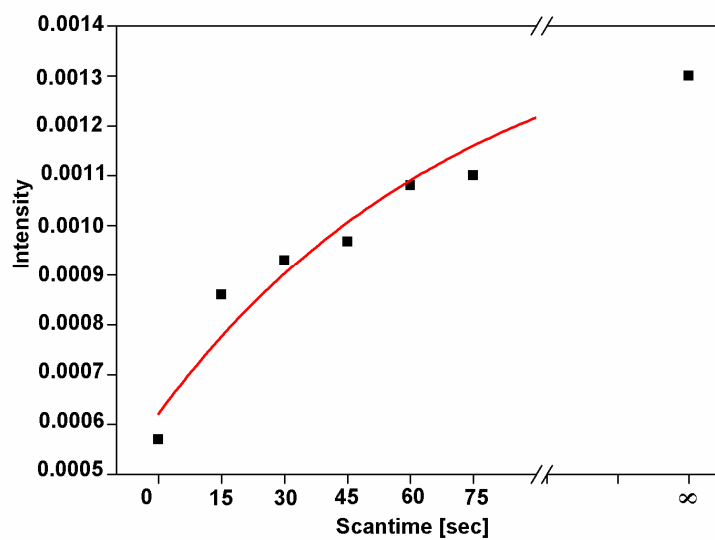

**Figure S2.** Intensity of the C(phenyl)-O stretch as a function of time and exponential function resulting from the fit of Figure 11 (main paper).
